# Short gamma-ray bursts with extended emission from magnetar birth: jet formation and collimation

N. Bucciantini,<sup>1</sup>★ B. D. Metzger,<sup>2</sup>† T. A. Thompson<sup>3</sup>‡ and E. Quataert<sup>4</sup>

<sup>1</sup>*NORDITA, AlbaNova University Center, Roslagstullsbacken 23, SE 10691 Stockholm, Sweden*

<sup>2</sup>*Department of Astrophysical Sciences, Peyton Hall, Princeton University, Princeton, NJ 08544, USA*

<sup>3</sup>*Department of Astronomy and Center for Cosmology & Astro-Particle Physics, The Ohio State University, Columbus, OH 43210, USA*

<sup>4</sup>*Astronomy Department and Theoretical Astrophysics Center, University of California, Berkeley, 601 Campbell Hall, Berkeley, CA 94720, USA*

Accepted 2011 September 12. Received 2011 September 12; in original form 2010 June 23

## ABSTRACT

Approximately 1/4–1/2 of short duration gamma-ray bursts (GRBs) are followed by variable X-ray emission lasting  $\sim 100$  s with a fluence comparable or exceeding that of the initial burst itself. The long duration and significant energy of this ‘extended emission’ (EE) poses a major challenge to the standard binary neutron star (NS) merger model. Metzger et al. recently proposed that the EE is powered by the spin-down of a strongly magnetized neutron star (a *millisecond protomagnetar*), which either survives the NS–NS merger or is created by the accretion-induced collapse (AIC) of a white dwarf. However, the effects of surrounding material on the magnetar outflow have not yet been considered. Here we present time-dependent axisymmetric relativistic magnetohydrodynamic simulations of the interaction of the relativistic protomagnetar wind with a surrounding  $10^{-1}$ – $10^{-3} M_{\odot}$  envelope, which represents material ejected during the merger, in the supernova following AIC, or via outflows from the initial accretion disc. The collision between the relativistic magnetar wind and the expanding ejecta produces a termination shock and a magnetized nebula inside the ejecta. A strong toroidal magnetic field builds up in the nebula, which drives a bipolar jet out through the ejecta, similar to the magnetar model developed in the case of long-duration GRBs. We quantify the ‘breakout’ time and opening angle of the jet  $\theta_j$  as a function of the wind energy flux  $\dot{E}$  and ejecta mass  $M_{ej}$ . We show that  $\dot{E}$  and  $\theta_j$  are inversely correlated, such that the beaming-corrected (isotropic) luminosity of the jet (and hence the observed EE) is primarily a function of  $M_{ej}$ . Both variability arguments, and the lower limit on the power of magnetar outflows capable of producing bright emission, suggest that the true opening angle of the magnetar jet must be relatively large. The model thus predicts a class of events for which the EE is observable with no associated short GRB. These may appear as long-duration GRBs or X-ray flashes unaccompanied by a bright supernova and not solely associated with massive star formation, which may be detected by future all-sky X-ray survey missions.

**Key words:** magnetic fields – MHD – methods: numerical – gamma-ray burst: general – stars: neutron – stars: winds, outflows.

## 1 INTRODUCTION

Gamma-ray bursts (GRBs) are canonically divided into ‘long soft’ (LGRB) and ‘short hard’ (SGRB) classes, based on their bimodal distribution in duration and spectral hardness (Kouveliotou et al. 1993). This division is supported by studies of the host galaxies

and environments of GRBs. LGRBs occur in late-type galaxies with high specific star formation rates (e.g. Fruchter et al. 2006; Levesque et al. 2010) and are accompanied by core collapse supernovae (SNe; Galama et al. 1998; Della Valle et al. 2006; Chornock et al. 2010; Starling et al. 2011). In contrast, SGRBs occur in both elliptical (Berger et al. 2005; Bloom et al. 2006) and late-type (Barthelmy et al. 2005; Fox et al. 2005) galaxies, they show larger average offsets from their host centres (e.g. Prochaska et al. 2006; Berger 2009; Fong, Berger & Fox 2010) and no evidence is found for a bright associated supernova in a few well-studied cases (e.g. Hjorth et al. 2005; Kann et al. 2008).

★E-mail: niccolo@nordita.org

†NASA Einstein fellow.

‡Alfred P. Sloan fellow.

The differences between long and short GRBs have motivated the development of distinct, albeit related, models for their central engines. LGRBs originate when the core of a rotating massive star collapses to form either a black hole (BH; MacFadyen & Woosley 1999) or a rapidly spinning, strongly magnetized neutron star (a *millisecond protomagnetar*; e.g. Usov 1992; Wheeler et al. 2000; Thompson, Chang & Quataert 2004). SGRBs are instead commonly attributed to the inspiral and merger of neutron star (NS)–NS or NS–BH binaries (Lee & Ramirez-Ruiz 2007; Nakar 2007), although the accretion-induced collapse (AIC) of a white dwarf (WD; Metzger et al. 2008a) or a NS (Dermer & Atoyan 2006) represents viable alternatives. In all SGRB models, the short  $\sim 0.1$ – $1$  s duration of the burst is related to the accretion time-scale of the compact  $\sim 10^{-3}$ – $0.1 M_{\odot}$  torus that forms around the central NS or BH following the merger (e.g. Janka et al. 1999) or AIC event (Dessart et al. 2006).

The standard LGRB/SGRB dichotomy has recently been challenged by several ‘hybrid’ events that conform to neither class (e.g. Zhang 2007; Bloom, Butler & Perley 2008). GRB 060505 and GRB 060614 are both long bursts based on their duration, yet neither shows evidence for a bright associated SN (Fynbo et al. 2006; Gal-Yam et al. 2006; Gehrels et al. 2006; Ofek et al. 2007). Although the short GRB 050724 occurred in an elliptical host with no associated SN, it was followed by variable X-ray emission lasting  $\sim 140$  s with a total fluence  $\sim 3$  times greater than the short GRB itself (Barthelmy et al. 2005). Similar to GRB 060614, the light curve of GRB 080503 was characterized by a hard initial spike, followed (after a brief lull) by a ‘hump’ of X-ray emission lasting  $\sim 100$  s and carrying  $\sim 30$  times the fluence of the initial spike (Perley et al. 2009). The rapid variability of this ‘extended emission’ (EE) strongly suggests that it results from ongoing central engine activity.

All together approximately  $\sim 1/4$  of *Swift* SGRBs<sup>1</sup> are accompanied by extended X-ray emission lasting for  $\sim 10$ – $100$  s with a fluence comparable or exceeding that of the GRB itself (see Norris & Gehrels 2008; Perley et al. 2009 for a compilation of events). The hybrid nature and common properties of these events (‘short GRB’ +  $\sim 100$  s X-ray tail) have motivated the introduction of a new subclass: short GRBs with extended emission (SGRBEEs). It was moreover recently discovered that some SGRBs are followed by an X-ray ‘plateau’ ending in a very sharp break (GRB 980515; Troja et al. 2008; Lyons et al. 2010; Rowlinson et al. 2010) and is difficult to explain by circumstellar interaction alone. Although the connection of this event to SGRBEEs is unclear, it nevertheless provides additional evidence that the central engine is active at late times.

An important observational question is whether SGRBEEs differ from ‘normal’ short bursts in other properties. Troja et al. (2008) found that SGRBEEs occur on average closer to the centres of their host galaxies than other SGRBs; however, the current paucity of well-localized events make statistical claims uncertain and recent studies have not verified this result (Berger 2009; Fong et al. 2010). Norris, Gehrels & Scargle (2011) showed that SGRBEEs differ also in the properties of the initial short GRB itself. They find that the average duration of the burst, and of individual pulse structures, is longer for short GRBs with EEs, possibly suggesting the existence of different progenitor channels (Leibler & Berger 2010; Virgili et al. 2011) or a different circumburst environment.

<sup>1</sup> When observational bias due to the effects of e.g. detection threshold is taken into account, the true fraction of SGRBEEs could be as high as  $\sim 50$  per cent (Norris, Gehrels & Scargle 2010).

The long duration and high fluence of the EE of SGRBEEs poses a serious challenge to the NS merger scenario, because in this model both the prompt and EE are necessarily powered by black hole accretion. It is in particular difficult to understand how such a high accretion rate is maintained at very late times. Although accretion of the torus formed from the merger may power the short GRB itself (e.g. Janka et al. 1999), the time-scale for the disc to accrete is short (typically  $\lesssim 1$  s), and the disc is disrupted by outflows soon thereafter (Lee, Ramirez-Ruiz & López-Cámara 2009; Metzger, Piro & Quataert 2009a,b). ‘Fall back’ accretion could in principle power late emission (Faber et al. 2006; Rosswog 2007; Chawla et al. 2010), but whether sufficient mass is placed on to the highly eccentric (yet bound) orbits required by this scenario is unclear. Full simulations of the fallback process, including the important effect of heating due to *r*-process nucleosynthesis (Metzger et al. 2010a), have yet to be performed. Even if sufficient mass returns at late times, the accretion will occur under radiatively inefficient conditions (e.g. Narayan, Piran & Kumar 2001); since the disc is only marginally bound when it cannot cool, most of the accreting mass may again be lost to (non-relativistic) outflows (Rossi & Begelman 2009).

### 1.1 The protomagnetar model for SGRBEEs

The hybrid properties of SGRBEEs hint that the engine could itself be of hybrid nature.<sup>2</sup> Metzger et al. (2008a) recently proposed that SGRBEEs result from the birth of a rapidly spinning protomagnetar, created by a NS–NS merger or the AIC of a WD (see Fig. 1 for a schematic illustration). In this model the short GRB is powered by the accretion of the initial torus (similar to standard NS merger models), but the EE is powered by a relativistic wind from the protomagnetar at later times, after the disc is disrupted. Although a NS remnant is guaranteed in the case of AIC, the merger of a double NS binary could also leave a stable NS remnant, provided that either (1) the total mass of the binary is low and/or the NS equation of state is stiff (Shibata & Taniguchi 2006); (2) the proto-NS forms in a metastable state supported by differential rotation (Baumgarte, Shapiro & Shibata 2000; Baiotti, Giacomazzo & Rezzolla 2008), but it then loses sufficient mass via magnetocentrifugal outflows (Thompson et al. 2004; Metzger, Thompson & Quataert 2007) to reach stability. The likelihood of this possibility has increased recently due to the discovery of a  $\approx 2 M_{\odot}$  NS (Demorest et al. 2010), which suggests that the nuclear EOS is indeed stiff (see also Özel et al. 2010). Given that rapid rotation is expected in both NS–NS merger and AIC scenarios, it is plausible that the proto-NS will generate a magnetar strength field by, for instance, an  $\alpha$ – $\Omega$  dynamo (Duncan & Thompson 1992), shear instabilities at the merger interface (Price & Rosswog 2006) or the magnetorotational instability (MRI; e.g. Akiyama et al. 2003; Thompson, Quataert & Burrows 2005).

Though not surrounded by the envelope of a massive star, magnetars formed from NS–NS mergers or AIC do not form in vacuum. In the AIC case  $\sim 10^{-3}$ – $10^{-2} M_{\odot}$  is ejected during the SN explosion on a time-scale  $\lesssim 1$  s (e.g. Woosley & Baron 1992; Dessart et al. 2006), while in NS–NS mergers a similar mass may be ejected

<sup>2</sup> Lazzati, Morsony & Begelman (2010) recently proposed that SGRBEEs may result from collapsars viewed off-axis. However, the differences between the host galaxies and environments between SGRBEEs and long GRBs (Berger 2009; Fong et al. 2010; Leibler & Berger 2010), and the lack in some events of an associated supernova, indicate that this is not the main channel.

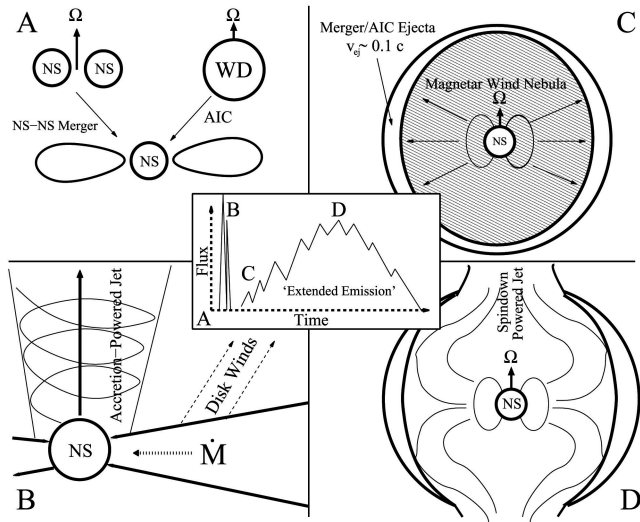

**Figure 1.** Schematic diagram of the stages of the protomagnetar model for short GRBs with EE. (A) The merger of two binary neutron stars, or the accretion-induced collapse of a rotating white dwarf, results in the formation of a compact  $\sim 10^{-3}$ – $0.1 M_{\odot}$  torus around the central protoneutron star. (B) Accretion of the torus powers a relativistic bipolar jet, resulting in a short GRB lasting  $\sim 0.1$ – $1$  s, similar to the standard NS–NS merger model. Following accretion, however, a rapidly spinning (millisecond) *protomagnetar* remains. (C) Material ejected during the merger, by the supernova following AIC, or via outflows from the accretion disc, results in a  $\sim 10^{-3}$ – $10^{-1} M_{\odot}$  envelope around the protomagnetar moving outwards with a velocity  $v_{ej} \sim 0.1$ – $0.2c$ . The relativistic wind from the protomagnetar collides with the ejecta, producing a MWN. (D) Magnetic stresses in the nebula redirect the magnetar wind into a bipolar jet. After the jet breaks through the ejecta on a time-scale  $\sim 1$ – $10$  s (Fig. 3), the magnetar wind escapes and accelerates to ultrarelativistic speeds (Fig. 2). Emission from the jet at much larger radii powers the EE lasting  $\sim 10$ – $100$  s, similar to the protomagnetar model for long GRBs (see Fig. 5).

dynamically due to tidal forces during the merger process (e.g. Rosswog 2007). Mass loss also occurs in outflows from the accretion disc on time-scales  $\lesssim$  seconds, due to heating from neutrinos (Metzger, Thompson & Quataert 2008c; Dessart et al. 2009), turbulent viscosity (Metzger, Piro & Quataert 2008b; Metzger et al. 2009a) and nuclear energy released by the recombination of free nuclei into  ${}^4\text{He}$  (Lee & Ramirez-Ruiz 2007; Metzger et al. 2008b; Lee et al. 2009). During the first few seconds after forming, outflows from the magnetar itself are heavily mass loaded and non-relativistic, resulting in a significant quantity of ejecta  $\gtrsim 10^{-3} M_{\odot}$  (Thompson et al. 2004; Bucciantini et al. 2006; Metzger et al. 2007). All together,  $\sim 10^{-3}$ – $0.1 M_{\odot}$  is ejected with a characteristic velocity  $v_{ej} \sim 0.1$ – $0.2c$  and kinetic energy  $\sim 2 \times 10^{50} (v_{ej}/0.1c)^2 (M_{ej}/0.01 M_{\odot}) \text{ erg}$ .

A few seconds after the merger or AIC, one is left with a protomagnetar embedded in a confining envelope.<sup>3</sup> This configuration is qualitatively similar to that developed in the protomagnetar model for LGRBs by Bucciantini et al. (2007, 2008, 2009), except that the enshrouding envelope is much less massive. In these previous

<sup>3</sup> In cases when the ejecta originates from the earlier (non-relativistic) stage of the magnetar wind, the distinction between ‘wind’ and ‘ejecta’ is blurred. In general, however, the magnetar outflow becomes ultrarelativistic relatively abruptly, such that this distinction is well-defined (Metzger et al. 2011).

works it was shown that, although the power in the magnetar wind is relatively isotropic (e.g. Bucciantini et al. 2006), its collision with the slowly expanding ejecta produces a hot ‘protomagnetar nebula’ (Bucciantini et al. 2007). As toroidal flux accumulates in the nebula, magnetic forces – and the anisotropic thermal pressure they induce – redirect the equatorial outflow towards the poles (Begelman & Li 1992; Königl & Granot 2002; Bucciantini et al. 2007, 2008, 2009; Komissarov & Barkov 2007; Uzdensky & MacFadyen 2007). Stellar confinement thus produces a mildly relativistic jet, which drills a bipolar cavity through the ejecta. Once the jet ‘breaks out’, an ultrarelativistic jet (fed by the magnetar wind at small radii) freely escapes. The EE is then powered as the jet dissipates its energy at much larger radii. One virtue of applying this picture to SGRBEEs is that it naturally explains why the EE resembles long GRBs in several properties, such as its duration and the existence of a late-time ‘steep decay’ phase (cf. Tagliaferri et al. 2005; Perley et al. 2009).

Although SGRBEEs resemble long GRBs in many properties, important differences also exist. The EE is generally softer (X-rays rather than gamma-rays), somewhat dimmer, and its variability is generally smoother (appearing to display e.g. a higher ‘duty cycle’) than long GRBs. Assessing the viability of the protomagnetar model for SGRBEEs therefore requires determining whether these differences may in part result from differences in the geometry of the relativistic outflow. These in turn may result because the confining ejecta is significantly less massive and dense than in the core collapse case.

In this paper we investigate the interaction of the relativistic protomagnetar wind with the expanding ejecta using axisymmetric (2D) relativistic MHD simulations. We focus in particular on the confining role of the ejecta and its dependence on the wind power, and on the ejecta mass and density profile. We show that collimation (jet formation) is achieved only within a bounded range of parameters. If the wind is too energetic, or the mass of the shell is too low, the ejecta is disrupted and little collimation occurs. In contrast, if the ejecta is sufficient massive and/or the wind is sufficient weak, the result is instead a ‘choked jet’ that may not emerge at all. We describe the numerical set-up in Section 2 and present our results in Section 3. We apply our results to SGRBEEs in Section 4 and conclude in Section 5.

## 2 NUMERICAL SET-UP

All calculations were performed using the shock-capturing central scheme for relativistic ideal MHD ECHO (Del Zanna, Bucciantini & Londrillo 2003; Del Zanna et al. 2007), using an ideal gas equation of state with an adiabatic coefficient  $\Gamma = 4/3$ , as appropriate for relativistically hot gas. We refer the reader to these papers for a detailed description of the equations and numerical algorithms.

We investigate the interaction of the magnetar wind with the surrounding ejecta envelope using 2D axisymmetric simulations on a spherical grid. The angular domain is  $\theta = [0, \pi]$  with reflecting boundary at the polar axis to enforce axisymmetry, while the radial domain extends over the range  $r = (10^7, 10^{12}) \text{ cm}$ . The grid in the radial direction is spaced logarithmically with 100 cells per decade, while spacing is uniform in the angular direction with 200 cells [we repeated selected simulations with twice the resolution to verify convergence; see also Camus et al. 2009 for estimates of convergence with grid resolution, in similar simulations as applied to pulsar wind nebulae (PWNe)]. We assume zeroth-order extrapolation at the outer boundary. The code is second-order in both space and time, with a monotonized central limiter, chosen in order to

resolve the large density jump between the lighter relativistic plasma inside the magnetar wind nebula (MWN) and the heavier envelope.

Bucciantini et al. (2007) showed that the interaction between a magnetar wind and a confining envelope depends on the strength of the toroidal magnetic field  $B$  in the MWN; this in turn depends on the magnetization in the wind ( $\sigma = r^2 B^2 c / \dot{E}$ , where  $\dot{E}$  is the wind energy flux) at the distance of the termination shock. Although  $\sigma$  can be calculated at the light cylinder radius with some confidence (e.g. Metzger et al. 2011), its value at larger radii is difficult to determine due to uncertainties in the conversion of magnetic energy into kinetic energy in relativistic winds (see Bucciantini et al. 2007 for a detailed discussion of this problem in the context of LGRBs). Moreover, instabilities may occur inside the MWN (Begelman 1998) which further reduce the toroidal magnetic field strength. Nevertheless, previous studies (Bucciantini et al. 2008, 2009) show that reliable results for the dynamics of the MWN and the properties of the jet are obtained using even the simplified regime of transverse relativistic MHD.

For protomagnetars with millisecond rotation periods, the light cylinder is located at  $\sim 10^7$  cm and the fast magnetosonic surface is at  $\sim 10^7$ – $10^8$  cm (Bucciantini et al. 2006). As in the calculations of Bucciantini et al. (2008), at the inner boundary we inject a supermagnetosonic wind with a fixed Lorentz factor  $\gamma = 25$  and a magnetization of  $\sigma = 0.1$ ; these values are appropriate for distances of the order of the termination shock radius if the conversion of magnetic to kinetic energy is efficient, and for typical properties of the magnetar wind at a few seconds after the protoneutron star forms (Metzger et al. 2011; see also the discussion in Section 3). Under these assumptions,  $\sigma$  is conserved throughout the upstream region. We assume that the wind contains a purely toroidal field and is cold with  $\rho c^2/p = 100$ , where  $\rho$  and  $p$  are the density and pressure, respectively. For simplicity we assume that  $\dot{E}$  and  $\gamma$  are constant, and that the wind is isotropic, throughout the simulation. Although in reality  $\gamma$  increases from  $\sim 1$  to  $\sim 100$ – $1000$  over tens of seconds as the protomagnetar cools (Metzger et al. 2011), studies of PWNe show that the dynamics becomes independent of  $\gamma$  in the limit  $\gamma \gg 1$ .

Following Darbha et al. (2010) we assume that the shell of ejecta expands radially homologously with a velocity  $v_{\text{ej}} = 0.2c(r/r_e)$  inside a low-density cavity of radius  $r_{\text{in}}$ , where  $r_e$  is the radius of the outer edge of the shell. To this self-similar profile we further allow for a modulation with polar angle  $\theta$ :

$$\rho = \begin{cases} K(1 - \alpha \cos 2\theta)r^{-C} & \text{if } r_{\text{in}} < r < r_e, \\ 10^{-5} \text{ g cm}^{-3} & \text{if } r < r_{\text{in}}, \end{cases} \quad (1)$$

where  $r_e = 6 \times 10^9$  cm,  $r_{\text{in}} = 1.5 \times 10^9$  cm (corresponding to initial conditions 1 s after ejection),  $C = 4$ ,  $K$  is fixed by the total ejecta mass  $M_{\text{ej}}$ , and we have chosen the density in the inner cavity to be sufficiently low as to have a negligible effect on the dynamics. The angular profile we adopt is equatorially concentrated, motivated by the possibilities that either (1) the ejecta is the result of an equatorially focused disc wind (e.g. Metzger et al. 2009a) or (2) a bipolar asymmetry remains from the jet produced during the early accretion-powered (short GRB) phase. Note that the self-similar profile of the ejecta implies that the ratio between the kinetic energy and mass of the ejecta is fixed at the value  $E_{\text{ej}}/M_{\text{ej}}c^2 \simeq 0.005$ . Outside  $r_e$  we assume a stationary, uniform medium with a density  $\rho = 10^{-5} \text{ g cm}^{-3}$ , which we have verified is sufficiently tenuous that it has negligible effects on the dynamics and geometry of jet formation.

### 3 RESULTS

Because of the self-similar nature of the ejecta, the dynamics of the wind–ejecta interaction is only a function of the ratio  $\dot{E}/M_{\text{ej}}$  and the wind magnetization  $\sigma$ , except as may result from latitudinal variations in the wind power. Even latitudinal effects are, however, suppressed by the formation of a MWN downstream of the termination shock. In this region the wind is decelerated, plasma is heated, the magnetic field is compressed and the pressure settles into a quasi-hydrostatic equilibrium, which depends only on  $\sigma$ .

In Fig. 2 we show the velocity and density profiles at  $t = 35$  s from calculations performed for three different values of the ratio  $\dot{E}/M_{\text{ej}} = 10^{50}$ ,  $10^{51}$  and  $10^{52} \text{ erg s}^{-1} M_{\odot}^{-1}$  (cases A, B and C, respectively). Significant differences are immediately apparent in the properties of the outflow and the overall dynamics of the MWN–ejecta interaction between the three cases. In both the low power (A) and ‘average’ (B) cases the MWN is confined within the ejecta. A well-collimated bipolar relativistic outflow develops, qualitatively similar to that found in the core collapse context as applied to LGRB (e.g. Bucciantini et al. 2008). In contrast, in the high power case (C) the MWN has almost completely blown the shell apart.

Quantifying the geometry of the jet, in order to measure e.g. the jet opening angle, is non-trivial because its shape is not simply conical. In case A the jet shape is parabolic, while in case C the jet ‘flares out’ into a diverging flow. In the high power case C, it is unclear whether the ejecta will provide any confinement at all. Although Rayleigh–Taylor instability is fundamentally a 3D process, and in principle axisymmetric simulations might fail to reproduce properly its detailed growth and geometrical properties, 2D simulations in the context of PWNe (Jun 1998; Bucciantini et al. 2004) agree with observations in term of the size and average properties of the unstable mixing layer. This might be due partly to the presence of a strong toroidal field which can suppress the growth in the azimuthal direction. We note, moreover, that the jet propagates through the ejecta approximately an order of magnitude faster than the time required for the shell to fragment. Thus, even in the case of an energetic wind, a collimated outflow may form initially in the polar region (albeit with a wide opening angle). In principle limited confinement could be hence maintained for a short time  $\sim 10$ – $30$  s, before shell fragmentation completes and the outflow becomes more isotropic.

Fig. 3 shows the ‘breakout’ time and characteristic opening angle of the jet as a function of  $\dot{E}/M_{\text{ej}}$ , calculated from several simulations including those shown in Fig. 2. The breakout time-scales approximately as  $\propto (\dot{E}/M_{\text{ej}})^{-1/2}$ . Although, given the self-similar nature of the ejecta, we expect that quantities should depend primarily on the ratio  $\dot{E}/M_{\text{ej}}$ , the precise functional dependence is non-trivial to derive. Although we find that the basic jet properties are relatively robust to our assumed value for  $C$ , more substantial changes could in principle result for different values of  $\dot{E}/M_{\text{ej}}$ ,  $r_e$  and  $r_{\text{in}}$ . Nevertheless, we do not expect large variations in the latter quantities, with respect to the fiducial values adopted in this paper.

Extrapolating Fig. 3 to low values  $\dot{E}/M_{\text{ej}} \lesssim 10^{49} \text{ erg s}^{-1} M_{\odot}^{-1}$ , we find that the jet requires  $\gtrsim 20$  s to breakout. This time-scale is comparable to both the delay observed before the onset of the EE in SGRBEEs, and to the time that the protomagnetar wind spends at its highest spin-down luminosity (Metzger et al. 2011).  $\dot{E}/M_{\text{ej}} \sim 10^{49} \text{ erg s}^{-1} M_{\odot}^{-1}$  thus represents a reasonable threshold power below which the jet is ‘choked’ inside the ejecta, in which case GRB-like high energy emission would fail. Naively it may appear that a similar criterion should apply also to the case of LGRBs, for which the typical mass of the surrounding envelope

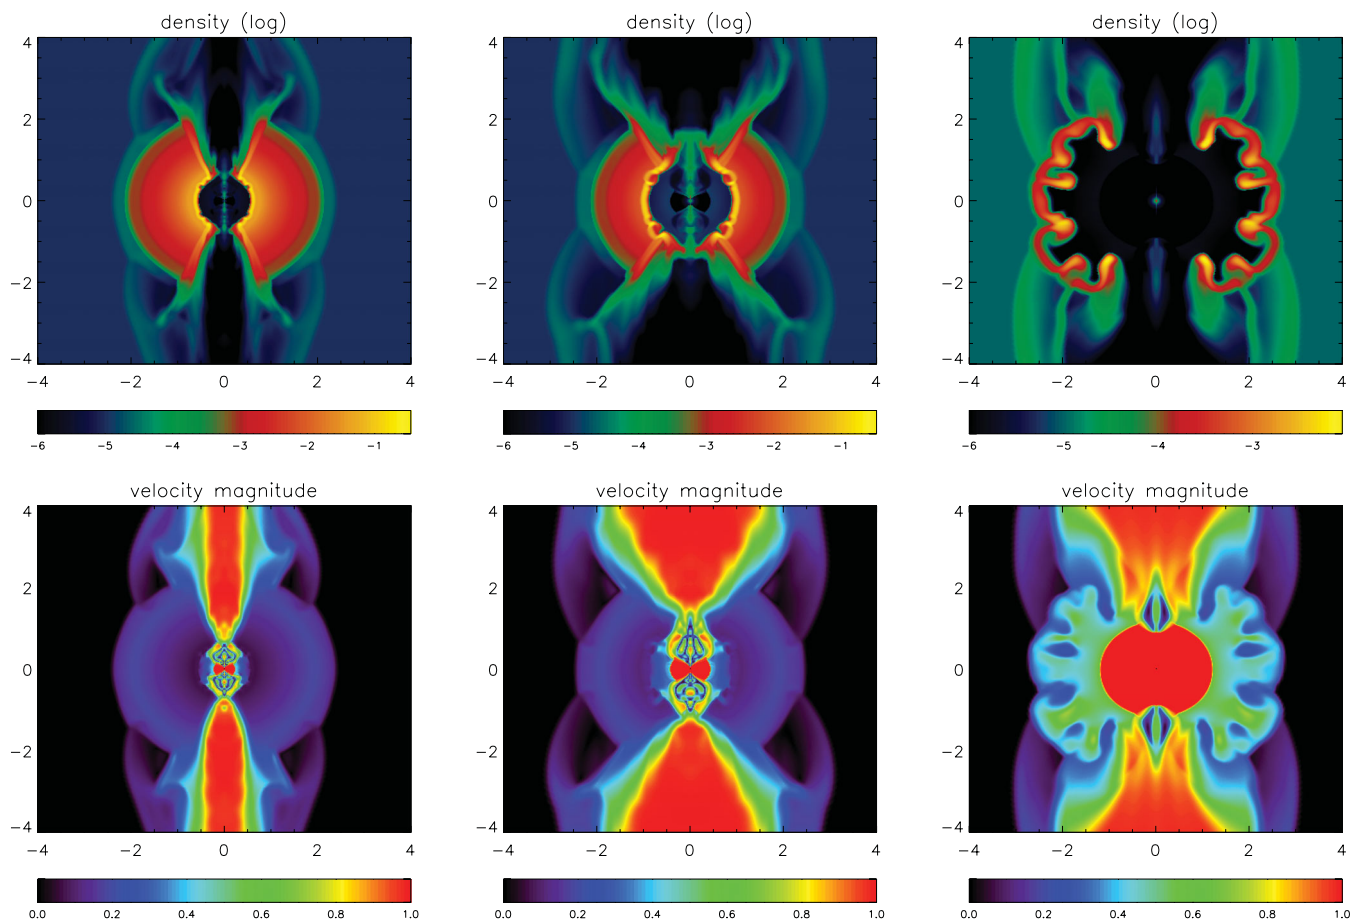

**Figure 2.** Snapshots of the interaction of the protomagnetar wind with the confining shell of ejecta at  $t = 35$  s. The upper panel shows the density structure (cgs units), while the lower panel shows the magnitude of the velocity in units of the speed of light. The left, centre and right columns show, respectively, cases corresponding to a low ( $\dot{E}/M_{\text{ej}} = 10^{50} \text{ erg s}^{-1} M_{\odot}^{-1}$ ; case A), ‘average’ ( $\dot{E}/M_{\text{ej}} = 10^{51} \text{ erg s}^{-1} M_{\odot}^{-1}$ ; case B) and high ( $\dot{E}/M_{\text{ej}} = 10^{52} \text{ erg s}^{-1} M_{\odot}^{-1}$ ; case C) power wind. Axis are in units of  $10^{11}$  cm.

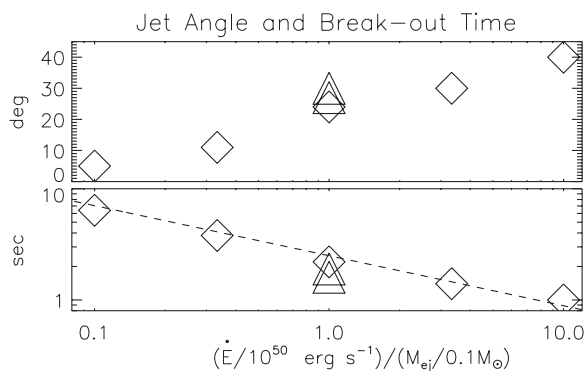

**Figure 3.** Properties of the relativistic jet. The upper panel shows the opening angle of the jet  $\theta_j$  at  $t \simeq 35$  s (Fig. 2) as a function of the ratio  $\dot{E}/M_{\text{ej}}$ . Diamonds represent cases for which the ejecta shell is uniform with angle, while triangles show cases assuming a lower polar densities ( $\alpha = 3-5$ ; see equation 1). The lower panel shows the time that the jet ‘breaks out’ from the shell of ejecta (symbols are the same as in the upper panel). The dashed line is a power law with exponent 0.5.

$\sim 10 M_{\odot}$  would imply a limit on the wind power  $\gtrsim 10^{50} \text{ erg s}^{-1}$ . Note, however, several important differences between the dynamics of the MWN in the LGRB and SGRBEE contexts. In the SGRBEE case, the ejecta expands at a significant fraction of the speed of light,

such that at  $t \sim 20$  s the shell radius ( $\sim 10^{11}$  cm) is significantly greater than the  $\sim 10^{10}$  cm radius of the progenitor envelope in the core collapse case. Since the polar expansion of the MWN is driven by internal pressure, the MWN suffers larger adiabatic losses in the SGRBEE scenario. The true threshold for a choked jet in the LGRB case thus occurs at lower luminosities  $\gtrsim 10^{49} \text{ erg s}^{-1}$ , more consistent with previous estimates in the literature (Matzner 2003).

Figs 2 and 3 show that the opening angle of the jet  $\theta_j$  increases with  $\dot{E}/M_{\text{ej}}$ . One reason for this dependence is that  $\theta_j$  is proportional to the ratio of the pressure scale height of the MWN in the cylindrical direction  $H$  (resulting from magnetic stresses perpendicular to the vertical axis) to the radius of the ejecta  $r_e$ . Since  $H$  is itself proportional to the radius of the MWN (Bucciantini et al. 2007), which is larger for more energetic jets, it follows that  $\theta_j$  also increases with  $\dot{E}/M_{\text{ej}}$ .

In addition to the calculations performed for isotropic ejecta (as in Fig. 2), in Fig. 3 we also show results for cases with a lower polar density ( $\alpha = 3-5$  in equation 1). We find that the jet breakout times and opening angles show a similar dependence to the isotropic case, provided that our results are parametrized in terms of an effective ejecta mass, defined as that of a spherically symmetric shell with a density equal to the polar value.

We now briefly discuss the acceleration and variability of the jet. In all cases we find that the jet accelerates approximately linearly with radius (i.e. bulk Lorentz factor  $\gamma \propto r$ ), suggesting efficient

acceleration, as in traditional GRB fireball models (e.g. Goodman 1986; Paczynski 1986), although acceleration is slightly faster in the lower power case (A). This is consistent with previous studies of relativistic jets, for which it is found that acceleration is more effective for more narrowly collimated outflows (Komissarov 2011). We also find that the Lorentz factor of the jet has a ‘top-hat’ angular profile, with a constant  $\gamma$  core and a sharp velocity gradient at the boundary to  $\gamma \gtrsim 1$ .

Although the properties of the injected magnetar wind are held constant in time, the properties of the jet as it leaves the ejecta are nevertheless variable. In particular, the Lorentz factor experiences order-unity fluctuations in the less energetic (more collimated) cases A and B on a length-scale of  $\sim 2 \times 10^{11}$  cm, corresponding to a typical time-scale  $\sim 5$ –6 s. In the high power case C the jet properties show a smoother time evolution. One reason for this difference is that variability results from interaction in the magnetar nebula (in particular with the walls of the ejecta channel; Morsony, Lazzati & Begelman 2010): higher power jets are less variable because the ejecta channel is larger and provides a less collimating environment. Indeed, we find that the observed time-scales are similar to the sound/Alfvénic time across the jet. Although we cannot rule out shorter time-scale variability, as it would not be resolved, significant changes in the fluid geometry on small scales seem unlikely given the relatively large size of the MWN system. As we discuss in Section 4, because narrow jets are predicted to be more variable than wider ones, the measured large amplitude variability of the EE provides an independent diagnostic of the jet opening angle.

Because the protomagnetar model for GRBs predicts a positive correlation between  $\dot{E}$  and the wind magnetization  $\sigma$  (Thompson et al. 2004; Metzger et al. 2011), we also repeat the case B calculation for a higher value  $\sigma = 0.2$ . We find that the jet breakout time is similar between the low and high magnetization cases, but the opening angle is a few degrees smaller in the high- $\sigma$  case. We want to stress here that we assume efficient conversion of magnetic to kinetic energy either in the wind or at the termination shock such that the system behaves as if  $\sigma < 1$  even for outflows that are Poynting flux dominated at the light cylinder (see the discussion in Bucciantini et al. 2007 for the case of a protoneutron star wind in the context of LGRBs). The problem of magnetic dissipation in winds has been investigated in the case of pulsars (Kirk & Skjæraasen 2003), while for dissipation at the termination shock the reader is referred to the recent results by Sironi & Spitkovsky (2011). Was also repeated our case B calculation for a shallower density profile  $C = 2$  (equation 1). Again we found no significant difference with respect to the reference case  $C = 4$ , which suggests that our results do not depend sensitively on the precise structure of the ejecta.

#### 4 IMPLICATIONS FOR SGRBEEs

After a clean opening is created through the ejecta, the power of the jet reflects, in a time- and angle-averaged sense, the value of  $\dot{E}(t)$  injected by the protomagnetar wind at much smaller radii (e.g. Bucciantini et al. 2009; Morsony et al. 2010). Most emission models for GRBs, such as internal shocks or magnetic reconnection, are the result of internal dissipation in the jet. In this case the observed (photon) luminosity is typically proportional to the beaming-corrected, or *isotropic*, jet luminosity  $\dot{E}_{\text{iso}} \equiv \dot{E} f_b^{-1}$ , where  $f_b \simeq \theta_j^2/2$  is the beaming fraction.

Fig. 4 shows  $\dot{E}_{\text{iso}}$  as a function of  $M_{\text{ej}}/\dot{E}$  for the same calculations shown in Fig. 3. The inverse correlation between the wind power and opening angle (Fig. 3) implies that, at fixed ejecta mass,  $\dot{E}_{\text{iso}}$  is constant to within a factor of  $\sim 3$  across two orders of magnitude

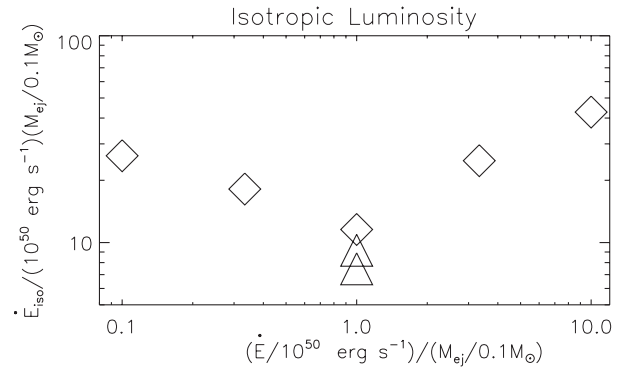

**Figure 4.** Isotropic jet luminosity  $\dot{E}_{\text{iso}} \equiv \dot{E} f_b^{-1}$ , where  $f_b = \Omega/4\pi \approx \theta_j^2/2$  is the jet beaming fraction and  $\Omega$  is the opening solid angle of the jet, after it has relaxed on a time-scale  $t \simeq 35$  s (Fig. 2). Diamonds show calculations performed assuming uniform ejecta, while triangles show cases with a lower polar density.

in  $\dot{E}$ . Thus, as long as the shell effectively collimates the outflow, the EE luminosity in the protomagnetar model depends primarily on  $M_{\text{ej}}$ . If, by contrast,  $\dot{E}/M_{\text{ej}} > 10^{52} \text{ erg s}^{-1} M_{\odot}^{-1}$ , then the shell may be entirely disrupted (in which case the isotropic luminosity is instead directly  $\propto \dot{E}$ ), while if  $\dot{E}/M_{\text{ej}} < 10^{49} \text{ erg s}^{-1} M_{\odot}^{-1}$ , the jet is probably choked and no emission is expected on time-scales of relevance.

The geometry of the magnetar jet also has consequences for the ubiquity of EE associated with short GRBs. As noted by Metzger et al. (2008a), without confinement the magnetar outflow (responsible for the EE) is mostly equatorial, while the accretion-powered jet (responsible for the initial short GRB) is probably polar. An important question is thus whether a typical observer will see both components. Our results show that, except perhaps in the most energetic cases, the magnetar wind is diverted into a polar outflow. Unfortunately, the opening angles of SGRBs are poorly constrained<sup>4</sup> observationally, with measured values ranging from a few to  $>25^\circ$  (Burrows et al. 2006; Grupe et al. 2006). Recent numerical results suggest values in the range of  $\sim 20^\circ$  (Rezzolla et al. 2011). It is thus possible that events could exist for which the EE is not observable because it is more collimated than the initial SGRB, in which case the event would be classified as a ‘normal’ short burst (see Barkov & Pozanenko 2011 for a similar idea). Such events cannot be too common because the fraction of short GRBs with observed EE is already rather large (Norris & Bonnell 2006). This implies that the magnetar wind cannot be too collimating, which suggests that the average shell mass is low (we provide additional evidence for a wide-angle magnetar jet below).

Alternatively, events may exist for which only the EE is observable, because the initial short burst is more narrowly collimated. These events would probably be classified as regular long duration GRBs or X-ray flashes, but would not be accompanied by a bright associated supernova. It is difficult to place definitive constraints on the rate of such events, although we note that at least one X-ray Flash with an EE-like light curve was not in fact accompanied by a bright supernova (XRF 040701; Soderberg et al. 2005).

We now attempt to constrain the properties of the ejecta using the measured luminosity of the EE. The sample of SGRBEEs with known redshifts and measured EE fluences is unfortunately small

<sup>4</sup> In such a ‘two-jet’ scenario it is also unclear with which jet, a putative measurement of the opening angle should be associated (e.g. Granot 2005).

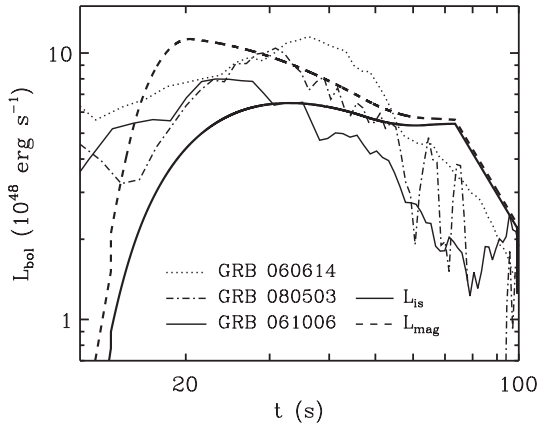

**Figure 5.** Average bolometric luminosity of GRB emission from the protomagnetar jet as a function of time after formation, calculated using the models described in Metzger et al. (2011). Emission predicted by the internal shock and magnetic dissipation models are shown with solid and dashed lines, respectively. The calculation assumes that the magnetar has an aligned dipole field of strength  $B_{\text{dip}} = 2 \times 10^{15}$  G and an initial spin period  $P_0 = 1.5$  ms. We adopt a value for the electron radiative efficiency  $\epsilon_e = 0.2$  and a beaming fraction  $f_b = 0.3$  (see text). For comparison we also plot the 15–350 keV *Swift*-Burst Alert Telescope (BAT) EE light curves for GRBs 060614 (dotted), 080503 (dot-dashed) and 061005 (triple-dot-dashed) (Butler & Kocevski 2007).

and incomplete. The sample may furthermore be biased against less luminous events, in which case the lower limits are not constraining. Nevertheless, when measured, the isotropic luminosity of the EE is typically in the range  $L_{\text{EE}} \sim 2 \times 10^{48} - 2 \times 10^{49}$  erg s $^{-1}$  (Fig. 5 shows some examples). Since we found that during the early jet formation phase the isotropic luminosity is (Fig. 4)

$$\dot{E}_{\text{iso},j} \sim 1-3 \times 10^{51} (M_{\text{ej}}/0.1 M_{\odot}) \text{ erg s}^{-1}, \quad (2)$$

we can relate the observed EE luminosity  $L_{\text{EE}}$  to the ejecta mass:

$$M_{\text{ej}} \sim 0.01-0.03 \left( \frac{L_{\text{EE}}}{10^{49} \text{ erg s}^{-1}} \right) \left( \frac{\eta_p}{0.1} \right)^{-1} \left( \frac{\eta_{\text{rad}}}{0.3} \right)^{-1} M_{\odot}, \quad (3)$$

where  $\eta_{\text{rad}} \equiv L_{\text{EE}}/\dot{E}_{\text{iso},j}$  is the radiative efficiency of the jet, and  $\eta_p \equiv \dot{E}_{\text{iso},j}/\dot{E}_{\text{iso},j} \sim 0.1-0.3$  is the ratio between the isotropic power of the magnetar wind during the EE phase  $\dot{E}_{\text{iso},j}$  at late times ( $t \sim 10-100$  s) and that at early times  $\dot{E}_{\text{iso},j}$  ( $t \lesssim 10$  s), when the opening angle of the jet is determined. Detailed evolutionary models of protomagnetar spin-down (Metzger et al. 2011) show that  $\eta_p$  is typically  $\sim 0.1-0.3$ .

Equation (3) shows that for typical values of  $\eta_{\text{rad}}$ ,  $\eta_{\text{EE}}$  and the measured EE luminosity, the inferred ejecta masses are in the range  $M_{\text{ej}} \sim 10^{-3}-10^{-1} M_{\odot}$ , consistent with the range of predicted ejecta masses in both the NS–NS merger and AIC scenarios (Section 1). This represents an important consistency check on the protomagnetar model.

Adopting a typical value of the ejecta mass  $M_{\text{ej}} = 10^{-2} M_{\odot}$ , our results require that the early-phase power of the protomagnetar wind must lie in the range  $\dot{E} \sim 10^{48}-10^{50}$  erg s $^{-1}$  so as to both maintain confinement and jet collimation, yet not produce a choked jet. This spin-down luminosity corresponds to magnetars with either a relatively slow initial rotation rate (spin period  $P_0 \gtrsim 3$  ms) or a relatively weak dipole magnetic field strength  $B_{\text{dip}} \lesssim 2 \times 10^{15}$  G (Metzger et al. 2010), as compared to those required to produce a bright classical GRB. However, rotation periods much larger than the breakup rate ( $P_0 \sim 1-2$  ms) seem unlikely given the substantial

angular momentum that is required in both NS–NS merger and AIC scenarios to form an initial disc. Thus, we are led to consider somewhat lower field magnetars.

In Fig. 5 we show models for the average bolometric luminosity of GRB emission from the protomagnetar jet, calculated using the models described in Metzger et al. (2011). We show the predicted emission in both internal shock and magnetic dissipation models, assuming the magnetar has an aligned dipole field of strength  $B_{\text{dip}} = 2 \times 10^{15}$  G and an initial spin period  $P_0 = 1.5$  ms. For comparison, we also plot the EE light curves of several *Swift*-detected SGRBEEs. In this model the jet power at  $t \sim 1-10$  s is  $\dot{E} \sim 10^{49}-10^{50}$  erg s $^{-1}$ . Applying these values to Fig. 3, we adopt a beaming fraction  $f_b \sim 0.3$  corresponding to a relatively large opening angle  $\theta_j \sim 45^\circ$ .

Fig. 5 demonstrates that the emission predicted by the protomagnetar model qualitatively agrees with the observed onset, duration and luminosity of SGRBEEs. Also note the presence of a phase of steep decay in some of the SGRBEE light curves at late times. A relatively abrupt shut off in prompt emission is indeed expected to occur in the magnetar model when the (initially opaque) protoneutron star becomes transparent to neutrino emission on a time-scale  $\sim 30-100$  s (see Metzger et al. 2011 for a discussion). The observed spectral properties of SGRBEEs can also be compared to the predictions of our emission models; in GRB 060614, for instance, the spectrum peaked at an energy  $E_{\text{peak}} \sim 50$  keV, which decreased by a factor of  $\sim 2$  throughout the EE (e.g. Zhang et al. 2007). For internal shock emission, the value of  $E_{\text{peak}}$  and its time evolution are unfortunately very sensitive functions of the assumed microphysical parameters, which makes a definitive comparison to our model challenging. By contrast, the magnetic dissipation model indeed predicts a lower value  $E_{\text{peak}} \lesssim 100$  keV for jets with smaller values of  $\dot{E}_{\text{iso}}$  and  $\sigma$  (see Metzger et al. 2011; their equation 11) as compared to those associated with standard long duration GRBs.

Although Fig. 5 shows a reasonably good fit to the EE light curves, similar agreement would not obtain for lower  $B_{\text{dip}}$  magnetars with less powerful winds. Less powerful outflows are ‘dirtier’ and require at least several tens of seconds before becoming optically thin at the emission radius (see fig. 8 of Metzger et al. 2011), inconsistent with the much earlier observed onset of the EE. Because the magnetar wind cannot be too weak, self-consistency with the results of Fig. 3 demands that the jet opening angle cannot be too small. We want to stress here that the problem of relating the outflow kinetic luminosity with the observed  $\gamma$ -ray emission depends on assumptions about acceleration efficiency and radiation mechanism that are still poorly understood, even in the canonical collapsar model of LGRBs. The present results should be considered indicative that the model can in principle reproduce the data at least in their broad temporal evolution. Indeed, the magnetar wind could also be much more powerful ( $\dot{E} \gg 10^{50}$  erg s $^{-1}$ ), in which case the shell may be completely blown apart (case C in Fig. 2). As discussed above, in this case the rate of events for which the EE would be observable without an accompanying short GRB would be quite high. Future all sky X-ray missions (e.g. JANUS; Fox & JANUS Team 2010) could detect SGRBEEs by triggering on their EE alone, and hence may be capable of addressing this question.

An independent way to break the degeneracy between wide- and narrow-angle jets is with variability. As discussed in Section 3, the amplitude of fluctuations in the jet properties scale inversely with the jet opening angle. Since EE are generally less variable than standard long duration GRBs, and the latter are estimated to have opening angles in the range of a few  $10^\circ$  (e.g. Frail et al. 2001), this also hints that larger opening angles are favoured for SGRBEEs.

## 5 CONCLUSIONS

The long durations and other similarities of the EE following some short GRBs are difficult to understand within the standard NS merger scenario. Building on the work of Metzger et al. (2008a), in this paper we present numerical simulations of the interaction between the energetic wind from a remnant protomagnetar and the ejecta from the merger or AIC event. We analyse the confining properties of the ejecta shell and calculate the dependence of the jet properties on the properties of the protomagnetar wind.

Our results show that, for the self-similar ejecta structure that we have assumed, the evolution of the system is primarily a function of the ratio between the power of the magnetar wind and the mass of the ejecta. Latitudinal density variations can be reparametrized in term of an effective mass. We also demonstrate that well-collimated jets form only over a limited range in energy: a sufficiently powerful wind completely disrupts the confining shell, while a lower wind instead produces a choked jet. Interestingly, we find an anticorrelation between the wind power and opening angle (in the range of  $\dot{E}/M_{\text{ej}}$  over which a collimated jet forms), which implies that the observed (isotropic) luminosity is almost independent of  $\dot{E}/M_{\text{ej}}$  (Fig. 4). Adopting a fiducial shell mass  $M_{\text{ej}} \sim 10^{-2} M_{\odot}$ , the corresponding luminosity  $\sim 10^{49} \text{ erg s}^{-1}$  is broadly consistent with observed EE luminosities (Fig. 5).

Considering the wind properties necessary to produce bright non-thermal emission also constrains the types of magnetars capable of powering the EE. Only magnetars with relatively strong surface dipole fields  $B_{\text{dip}} \gtrsim 10^{15} \text{ G}$  produce winds that are sufficiently ‘clean’, such that they become optically thin at the radii where the jet energy is dissipated sufficiently early to explain the  $\sim 10 \text{ s}$  observed onset of the EE. Consistent with this notion, we find that a millisecond magnetar with  $\gtrsim 10^{15} \text{ G}$  indeed produces emission qualitatively consistent with observed EE light curves (Fig. 5).

Our investigation has primarily focused on a fiducial profile for the ejecta. As discussed in the Introduction, although the ejecta mass may vary by a factor of  $\gtrsim 100$  depending on e.g. the scenario responsible for producing the magnetar (Fig. 1), the characteristic size and velocity of the ejecta are not expected to vary by more than a factor of a few. For these reasons our results may be relatively robust. We caution, however, that a full parameter study is necessary to properly investigate questions such as to what degree the opening angle and breakout time depend on additional parameters, such as the relative size of the inner and outer radius of the ejecta.

One limitation of our calculations is that the properties of the jet depend on the assumed magnetization of the wind  $\sigma = 0.1$ , which was chosen because (1) previous results in the context of LGRBs (Bucciantini et al. 2008) agree with more detailed calculations where the magnetization in the wind evolves according to the value near the light cylinder predicted from evolutionary models including PNS cooling (Bucciantini et al. 2009); and (2) because a variety of processes at work in the wind, the termination shock, and the nebula, may dissipate the toroidal flux, as is inferred in PWNs. Recently Mizuno et al. (2011) have shown that current-driven instability can efficiently reduce the amount of toroidal magnetic field. They conclude that the magnetic field in the nebula can behave as if the effective  $\sigma$  is much lower (less by a factor of 10) than the true value. If this also holds in the more complex scenario of a MWN, then it is possible that current-driven instabilities may regulate the magnetization, such that the lower effective value of  $\sigma$  as we have chosen is appropriate.

Up to this point we have not discussed how to distinguish between protomagnetars formed from AIC and via NS–NS mergers, since

the physical scenario is similar (see Fig. 1). Although in neither case do we expect the event to be associated with bright supernova, the ejecta is nevertheless composed of radioactive isotopes. As this material decays to stability, it reheats the ejecta, powering transient optical emission lasting  $\sim 1 \text{ d}$ , with a peak brightness  $\nu L_{\nu} \sim 10^{41-42} \text{ erg s}^{-1}$ , approximately a thousand times brighter than a nova (Metzger et al. 2009b, 2010b). Although such ‘kilonova’ have not yet been definitively detected (although see Perley et al. 2009), current searches are underway (Kasliwal et al. 2010). One way to distinguish between AIC and NS–NS mergers is that, in AIC the ejecta is predicted to be rich in Fe-group elements (e.g.  $^{56}\text{Ni}$ ; Metzger et al. 2009b; Darbha et al. 2010), while in NS–NS mergers the ejecta is composed of more exotic, heavy  $r$ -process nuclei (Metzger et al. 2010b). We note that if the protomagnetar injects additional energy behind the expanding ejecta, and if this energy is thermalized, this could enhance the luminosity of the predicted kilonova emission, as in analogous models for very luminous core collapse SN (Kasen & Bildsten 2010; Woosley 2010; Piro & Ott 2011). We plan to explore this possibility further in future work. Evidence of a large opening angle for magnetar outflows in SGRBEEs suggests the possibility of a strong interaction between the flow and (1) the companion in the AIC scenario, (2) a possible tertiary component in the NS–NS merger scenario (Thompson 2010) or (3) the clumps of matter ejected in unbound orbits in both scenarios. Such interactions could lead to observational signatures, which might help discriminate among the various scenarios (Marietta, Burrows & Fryxell 2000; MacFadyen, Ramirez-Ruiz & Zhang 2005).

Another characteristic distinguishing NS–NS mergers and AIC is the strength and form of their gravitational wave signal (Abdikamalov et al. 2010). The coincident detection (or constraining upper limits) on gravitational wave emission from SGRBEEs with future detectors such as Advanced LIGO/Virgo should conclusively settle this issue. The detection of a giant SGR-like flare from the location of a previous SGRBEE (Giannios 2010) would be ‘smoking gun’ proof that magnetar birth is at the origin of these events.

## ACKNOWLEDGMENTS

We thank Daniel Perley for his assistance with the *Swift* data. NB is supported by a NORDITA fellowship grant. BDM is supported by NASA through Einstein post-doctoral fellowship grant number PF9-00065 awarded by the *Chandra* X-ray Center, which is operated by the Smithsonian Astrophysical Observatory for NASA under contract NAS8-03060. TAT is supported in part by an Alfred P. Sloan Foundation fellowship.

## REFERENCES

- Abdikamalov E. B., Ott C. D., Rezzolla L., Dessart L., Dimmelmeier H., Marek A., Janka H., 2010, *Phys. Rev. D*, 81, 044012
- Akiyama S., Wheeler J. C., Meier D. L., Lichtenstadt I., 2003, *ApJ*, 584, 954
- Baiotti L., Giacomazzo B., Rezzolla L., 2008, *Phys. Rev. D*, 78, 084033
- Barkov M. V., Pozanenko A. S., 2011, preprint (arXiv:1103.4246)
- Barthelmy S. D. et al., 2005, *Nat*, 438, 994
- Baumgarte T. W., Shapiro S. L., Shibata M., 2000, *ApJ*, 528, L29
- Begelman M. C., 1998, *ApJ*, 493, 291
- Begelman M. C., Li Z., 1992, *ApJ*, 397, 187
- Berger E., 2009, *ApJ*, 690, 231
- Berger E. et al., 2005, *Nat*, 438, 988
- Bloom J. S. et al., 2006, *ApJ*, 638, 354



- Bloom J. S., Butler N. R., Perley D. A., 2008, in Galassi M., Palmer D., Fenimore E., eds, AIP Conf. Ser. Vol. 1000, Gamma-ray Bursts 2007. Am. Inst. Phys., New York, p. 11
- Bucciantini N., Amato E., Bandiera R., Blondin J. M., Del Zanna L., 2004, *A&A*, 423, 253
- Bucciantini N., Thompson T. A., Arons J., Quataert E., Del Zanna L., 2006, *MNRAS*, 368, 1717
- Bucciantini N., Quataert E., Arons J., Metzger B. D., Thompson T. A., 2007, *MNRAS*, 380, 1541
- Bucciantini N., Quataert E., Arons J., Metzger B. D., Thompson T. A., 2008, *MNRAS*, 383, L25
- Bucciantini N., Quataert E., Metzger B. D., Thompson T. A., Arons J., Del Zanna L., 2009, *MNRAS*, 396, 2038
- Burrows D. N. et al., 2006, *ApJ*, 653, 468
- Butler N. R., Kocevski D., 2007, *ApJ*, 663, 407
- Camus N. F., Komissarov S. S., Bucciantini N., Hughes P. A., 2009, *MNRAS*, 400, 1241
- Chawla S., Anderson M., Besselman M., Lehner L., Liebling S. L., Motl P. M., Neilsen D., 2010, *Phys. Rev. Lett.*, 105, 111101
- Chornock R. et al., 2010, preprint (arXiv:1004.2262)
- Darha S., Metzger B. D., Quataert E., Kasen D., Nugent P., Thomas R., 2010, *MNRAS*, 409, 846
- Della Valle M. et al., 2006, *ApJ*, 642, L103
- Del Zanna L., Bucciantini N., Londrillo P., 2003, *A&A*, 400, 397
- Del Zanna L., Zanotti O., Bucciantini N., Londrillo P., 2007, *A&A*, 473, 11
- Demorest P. B., Pennucci T., Ransom S. M., Roberts M. S. E., Hessels J. W. T., 2010, *Nat*, 467, 1081
- Dermer C. D., Atayan A., 2006, *ApJ*, 643, L13
- Dessart L., Burrows A., Ott C. D., Livne E., Yoon S., Langer N., 2006, *ApJ*, 644, 1063
- Dessart L., Ott C. D., Burrows A., Rosswog S., Livne E., 2009, *ApJ*, 690, 1681
- Duncan R. C., Thompson C., 1992, *ApJ*, 392, L9
- Faber J. A., Baumgarte T. W., Shapiro S. L., Taniguchi K., 2006, *ApJ*, 641, L93
- Fong W., Berger E., Fox D. B., 2010, *ApJ*, 708, 9
- Fox D. B., JANUS Team, 2010, *BAAS*, 42, 481
- Fox D. B. et al., 2005, *Nat*, 437, 845
- Frail D. A. et al., 2001, *ApJ*, 562, L55
- Fruchter A. S. et al., 2006, *Nat*, 441, 463
- Fynbo J. P. U. et al., 2006, *Nat*, 444, 1047
- Galama T. J. et al., 1998, *Nat*, 395, 670
- Gal-Yam A. et al., 2006, *Nat*, 444, 1053
- Gehrels N. et al., 2006, *Nat*, 444, 1044
- Giannios D., 2010, *MNRAS*, 403, L51
- Goodman J., 1986, *ApJ*, 308, L47
- Granot J., 2005, *ApJ*, 631, 1022
- Grupe D., Burrows D. N., Patel S. K., Kouveliotou C., Zhang B., Mészáros P., Wijers R. A. M., Gehrels N., 2006, *ApJ*, 653, 462
- Hjorth J. et al., 2005, *Nat*, 437, 859
- Janka H., Eberl T., Ruffert M., Fryer C. L., 1999, *ApJ*, 527, L39
- Jun B. I., 1998, *ApJ*, 499, 282
- Kann D. A. et al., 2008, preprint (arXiv:0804.1959)
- Kasen D., Bildsten L., 2010, *ApJ*, 717, 245
- Kasliwal M. M. et al., 2010, preprint (arXiv:1003.1720)
- Kirk J. G., Skjæraasen O., 2003, *ApJ*, 591, 366
- Komissarov S. S., 2011, *Mem. Soc. Astron. Ital.*, 82, 95
- Komissarov S. S., Barkov M. V., 2007, *MNRAS*, 382, 1029
- Königl A., Granot J., 2002, *ApJ*, 574, 134
- Kouveliotou C., Meegan C. A., Fishman G. J., Bhat N. P., Briggs M. S., Koshut T. M., Paciesas W. S., Pendleton G. N., 1993, *ApJ*, 413, L101
- Lazzati D., Morsony B. J., Begelman M. C., 2010, *ApJ*, 717, 239
- Lee W. H., Ramirez-Ruiz E., 2007, *New J. Phys.*, 9, 17
- Lee W. H., Ramirez-Ruiz E., López-Cámara D., 2009, *ApJ*, 699, L93
- Leibler C. N., Berger E., 2010, *ApJ*, 725, 1202
- Levesque E. M., Kewley L. J., Berger E., Jabran Zahid H., 2010, *AJ*, 140, 1557
- Lyons N., O'Brien P. T., Zhang B., Willingale R., Troja E., Starling R. L. C., 2010, *MNRAS*, 402, 705
- MacFadyen A. I., Woosley S. E., 1999, *ApJ*, 524, 262
- MacFadyen A. I., Ramirez-Ruiz E., Zhang W., 2005, *BAAS*, 37, 151
- Marietta E., Burrows A., Fryxell B., 2000, *ApJS*, 128, 615
- Matzner C. D., 2003, *MNRAS*, 345, 575
- Metzger B. D., Thompson T. A., Quataert E., 2007, *ApJ*, 659, 561
- Metzger B. D., Quataert E., Thompson T. A., 2008a, *MNRAS*, 385, 1455
- Metzger B. D., Piro A. L., Quataert E., 2008b, *MNRAS*, 390, 781
- Metzger B. D., Thompson T. A., Quataert E., 2008c, *ApJ*, 676, 1130
- Metzger B. D., Piro A. L., Quataert E., 2009a, *MNRAS*, 396, 304
- Metzger B. D., Piro A. L., Quataert E., 2009b, *MNRAS*, 396, 1659
- Metzger B. D., Arcones A., Quataert E., Martínez-Pinedo G., 2010a, *MNRAS*, 402, 2771
- Metzger B. D. et al., 2010b, *MNRAS*, 406, 2650
- Metzger B. D., Giannios D., Thompson T. A., Bucciantini N., Quataert E., 2011, *MNRAS*, 413, 2031
- Mizuno Y., Lyubarsky Y., Nishikawa K., Hardee P. E., 2011, *ApJ*, 728, 90
- Morsony B. J., Lazzati D., Begelman M. C., 2010, *ApJ*, 723, 267
- Nakar E., 2007, *Phys. Rep.*, 442, 166
- Narayan R., Piran T., Kumar P., 2001, *ApJ*, 557, 949
- Norris J. P., Bonnell J. T., 2006, *ApJ*, 643, 266
- Norris J. P., Gehrels N., 2008, in Galassi M., Palmer D., Fenimore E., eds, AIP Conf. Ser. Vol. 1000, Gamma-ray Bursts 2007. Am. Inst. Phys., New York, p. 280
- Norris J. P., Gehrels N., Scargle J. D., 2010, *ApJ*, 717, 411
- Norris J. P., Gehrels N., Scargle J. D., 2011, *ApJ*, 735, 23
- Ofek E. O. et al., 2007, *ApJ*, 662, 1129
- Özel F., Psaltis D., Ransom S., Demorest P., Alford M., 2010, *ApJ*, 724, L199
- Paczynski B., 1986, *ApJ*, 308, L43
- Perley D. A. et al., 2009, *ApJ*, 696, 1871
- Piro A. L., Ott C. D., 2011, *ApJ*, 736, 108
- Price D. J., Rosswog S., 2006, *Sci*, 312, 719
- Prochaska J. X. et al., 2006, *ApJ*, 642, 989
- Rezzolla L., Giacomazzo B., Baiotti L., Granot J., Kouveliotou C., Aloy M. A., 2011, *ApJ*, 732, L6
- Rossi E. M., Begelman M. C., 2009, *MNRAS*, 392, 1451
- Rosswog S., 2007, *MNRAS*, 376, L48
- Rowlinson A. et al., 2010, *MNRAS*, 409, 531
- Shibata M., Taniguchi K., 2006, *Phys. Rev. D*, 73, 064027
- Sironi L., Spitkovsky A., 2011, preprint (arXiv:1107.0977)
- Soderberg A. M. et al., 2005, *ApJ*, 627, 877
- Starling R. L. C. et al., 2011, *MNRAS*, 411, 2792
- Tagliaferri G. et al., 2005, *Nat*, 436, 985
- Thompson T. A., 2010, preprint (arXiv:1011.4322)
- Thompson T. A., Chang P., Quataert E., 2004, *ApJ*, 611, 380
- Thompson T. A., Quataert E., Burrows A., 2005, *ApJ*, 620, 861
- Troja E., King A. R., O'Brien P. T., Lyons N., Cusumano G., 2008, *MNRAS*, 385, L10
- Usov V. V., 1992, *Nat*, 357, 472
- Uzdensky D. A., MacFadyen A. I., 2007, *ApJ*, 669, 546
- Virgili F. J., Zhang B., O'Brien P., Troja E., 2011, *ApJ*, 727, 109
- Wheeler J. C., Yi I., Höflich P., Wang L., 2000, *ApJ*, 537, 810
- Woosley S. E., 2010, *ApJ*, 719, L204
- Woosley S. E., Baron E., 1992, *ApJ*, 391, 228
- Zhang B., 2007, *Chinese J. Astron. Astrophys.*, 7, 1
- Zhang B., Zhang B.-B., Liang E.-W., Gehrels N., Burrows D. N., Mészáros P., 2007, *ApJ*, 655, L25

This paper has been typeset from a  $\text{\TeX}/\text{\LaTeX}$  file prepared by the author.
